# Supplementary material
Source: publisher site journal article supplement (https://www.dovepress.com/article/336099)
Supplement: Supplementary file 1 [file get_supplementary_file.php]

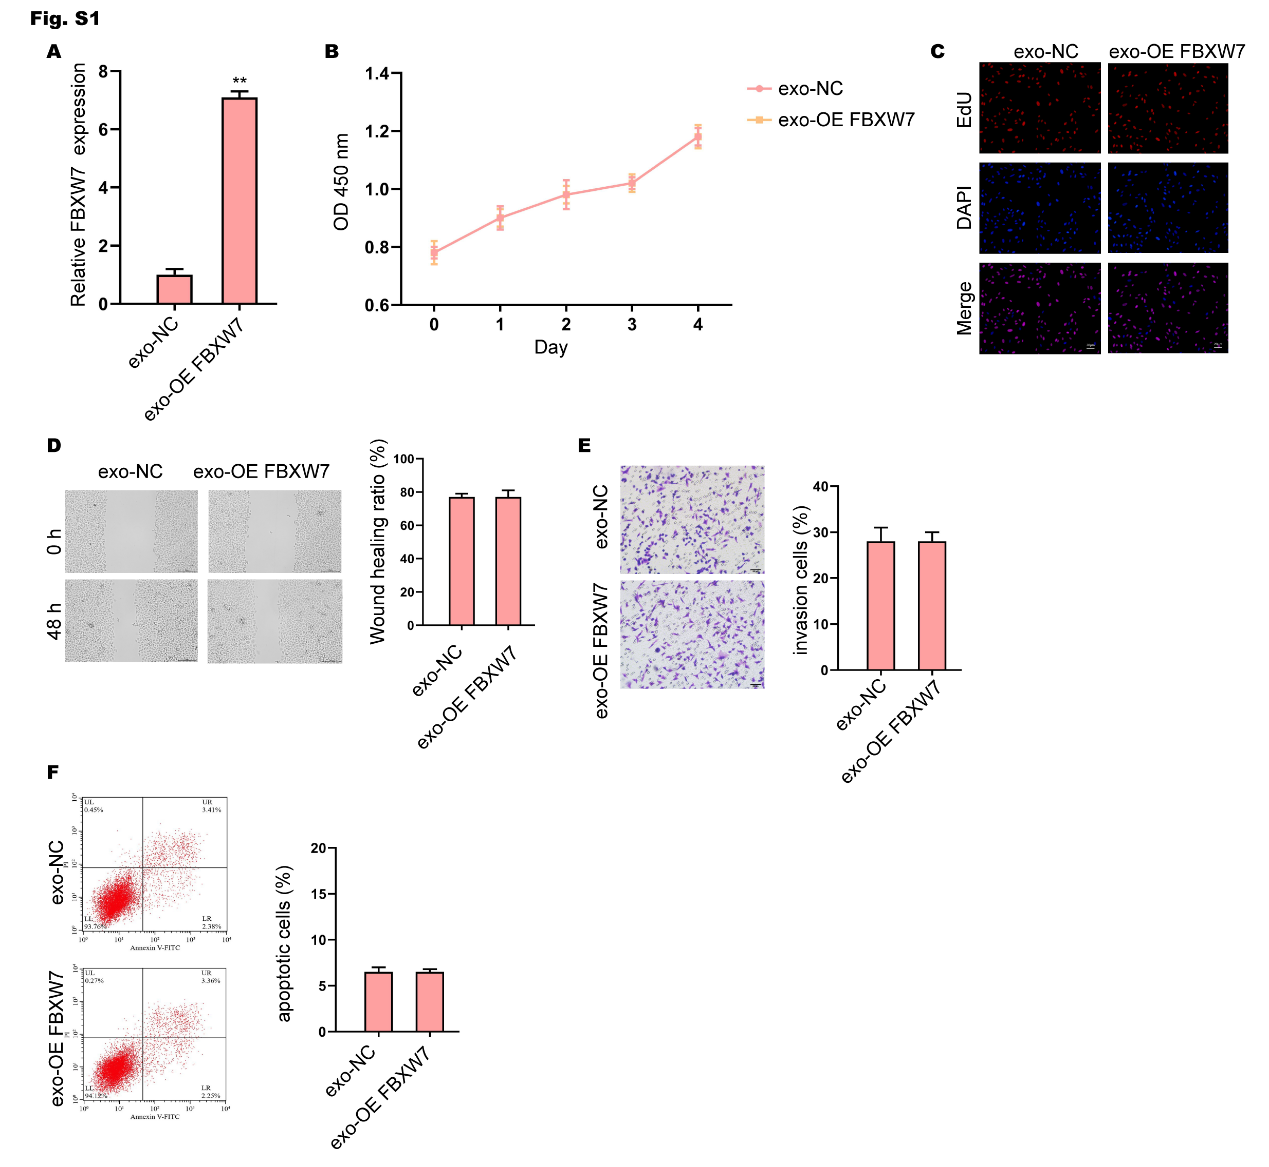
Figure S1. Exosomal-FBXW7 have no effect on proliferation and migration of fibroblast-like synoviocytes. The MH7A cells were treated with exosomes isolated from FBXW7 transfected MSCs (exo-OE FBXW7). (A) The expression of FBXW7 was analyzed by qPCR. (B) The cell viability was checked by CCK-8 assays. (C) The cell proliferation was measured by EdU assays. (D-E) The cell invasion and migration were determined by Transwell and wound healing assay. (F) Cell apoptosis was measured by flow cytometry. ** *P* < 0.01.
